# Supplementary material for: Enhancement of the power factor of SnSe by adjusting the crystal and energy band structures
Source: Royal Society of Chemistry journal article supplement (doi:10.1039/d2cp03300c), 2022-01-01
Supplement: d2cp03300c1.pdf [file d2cp03300c1.pdf]

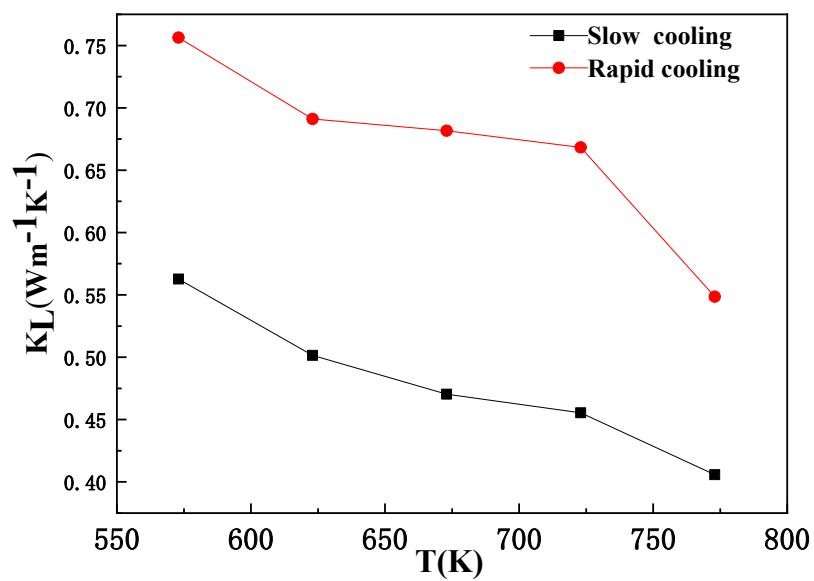

SFig 1 Lattice thermal conductivity of the fast cooling sample and the slow cooling sample in the " $\perp$ " direction
